# Supplementary material
Source: PubMed Central journal article supplement (PMC9529814)
Supplement: NIHMS1812976-supplement-2.pdf [file NIHMS1812976-supplement-2.pdf]

**Supplemental Material**

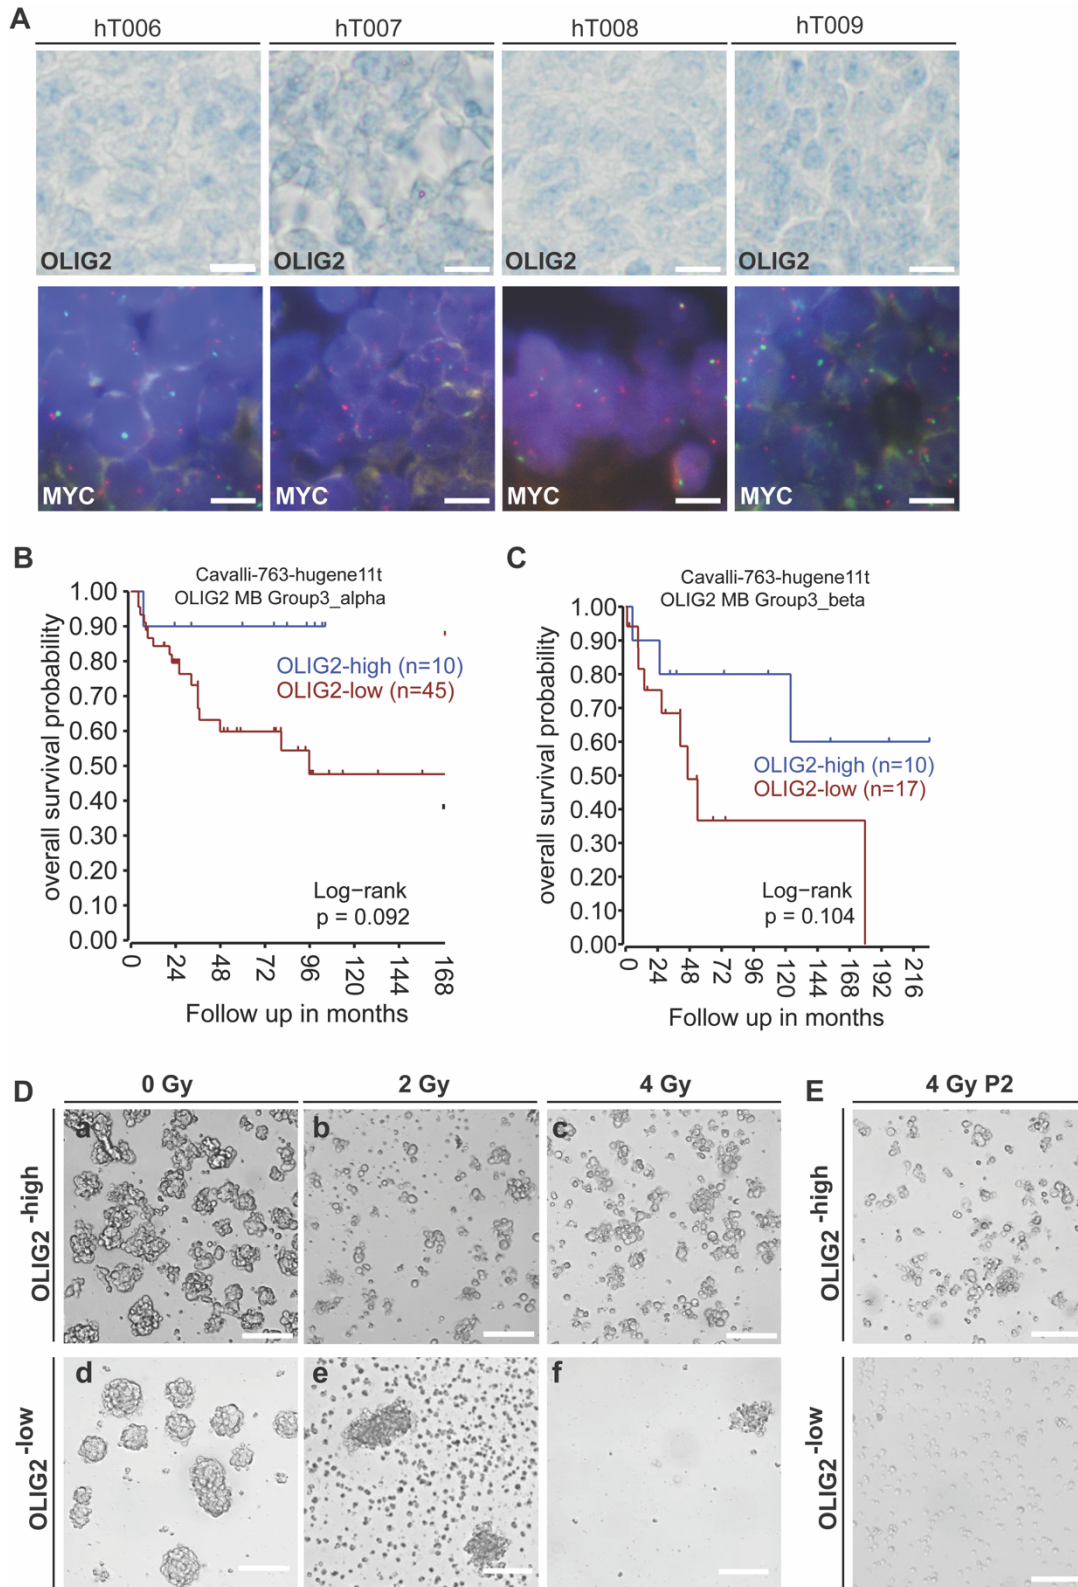

**Figure S1**

**Figure S1. OLIG2<sup>high</sup> MYC-amplified MB cells are resistant to irradiation compared to OLIG2<sup>low</sup> MYC-amplified MB cells *in vitro***

(A) OLIG2 or MYC expression in non-MYC amplified tumors resected from patients, as assessed by IHC (OLIG2) or FISH (MYC). No OLIG2 expression was detected in the non-MYC-amplified MB tumors examined. IHC, scale bars = 25  $\mu$ m. FISH, scale bars = 10  $\mu$ m.

(B-C) Correlation of OLIG2 expression with patient survival in Group 3 $\alpha$  MB (B) or Group 3 $\beta$  MB (C).

(D) OLIG2<sup>high</sup> (MB002) or OLIG2<sup>low</sup> (RCMB28) MYC-amplified MB PDX cells were treated with radiation at the indicated dose and cultured for 7 days in a medium that favors the growth of stem cells. Bright field. Scale bars = 100  $\mu$ m.

(E) Irradiated OLIG2<sup>high</sup> (MB002) cells (top) and or OLIG2<sup>low</sup> (RCMB28) cells (bottom) after passaging. Bright field. Scale bars = 100  $\mu$ m.

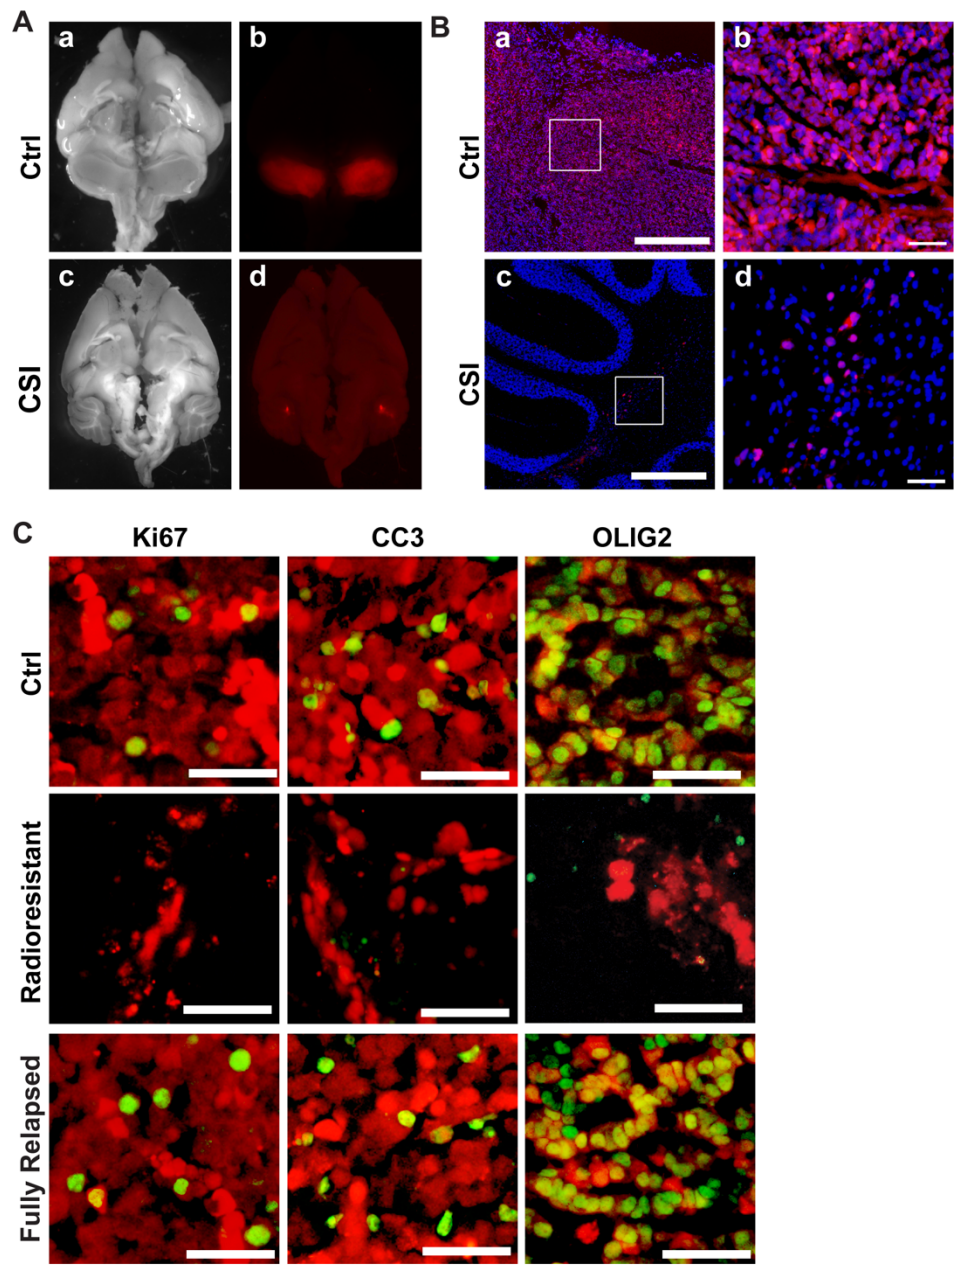

**Figure S2**

**Figure S2. Characterization of radioresistant tumor cells in Med-211FH**

(A) Images of brain tissue from tumor-bearing animals without (a, b) or with (c, d) irradiation. Whole mount images in bright field. Tumor cells are indicated in red (mCherry).

(B) Sagittal sections from tumors without (a, b) or with (c, d) irradiation stained with DAPI (blue). Tumor cells are indicated in red (mCherry). Scale bars = 500  $\mu\text{m}$  in a and c. Images for b and d are high magnification closeup of images in the inset boxes of a and c, respectively. Scale bars = 50  $\mu\text{m}$  in b and d.

(C) IHC staining with antibodies (green) against Ki67, CC3 or OLIG2 in the untreated control tumors (top), residual radioresistant tumor cells (middle) or fully relapsed tumors post radiotherapy (bottom). Scale bars = 50  $\mu\text{m}$ . Tumor cells are indicated in red (mCherry) in all panels.

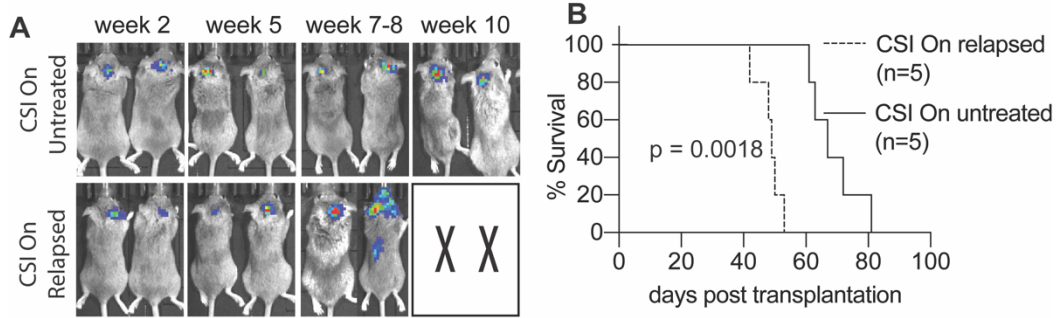

**Figure S3**

**Figure S3. Relapsed tumors are less sensitive to re-irradiation than primary tumors**  
 (A) IVIS images of representative mice bearing primary tumor cells (top panels), or relapsed tumors (bottom panels), both treated with radiation.  
 (B) Survival analysis by Kaplan Meier (n=5 each group). Logrank test, p=0.0018.

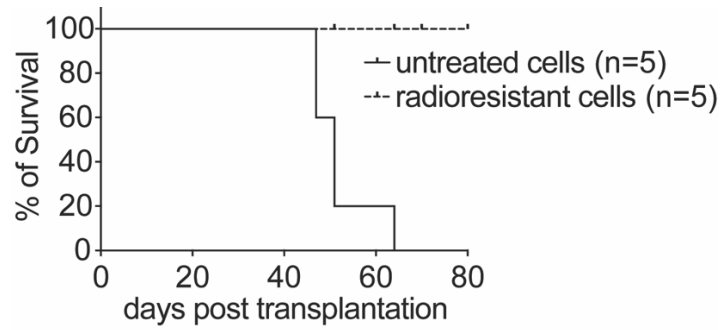

**Figure S4**

**Figure S4. Freshly isolated residual radioresistant tumor cells without culture did not give rise to tumors post-transplantation.** Survival curves for animals transplanted with 2,000 freshly FAC-sorted cells from untreated tumors, or from radioresistant tumor cells. Survival analysis by Kaplan Meier (n=5 each group).

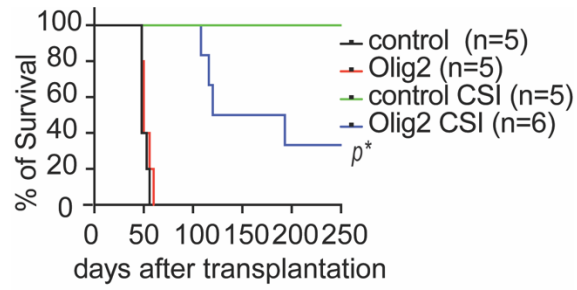

**Figure S5**

**Figure S5. OLIG2 overexpression confers radioresistance in OLIG2<sup>low</sup> MYC-amplified MB.** Survival of animals transplanted with control tumor cells or unpurified OLIG2<sup>GFP</sup>-lentivirus-infected tumor cells with or without CSI. Logrank test  $p^*=0.0005$ , OLIG2 CSI group vs. control CSI group.

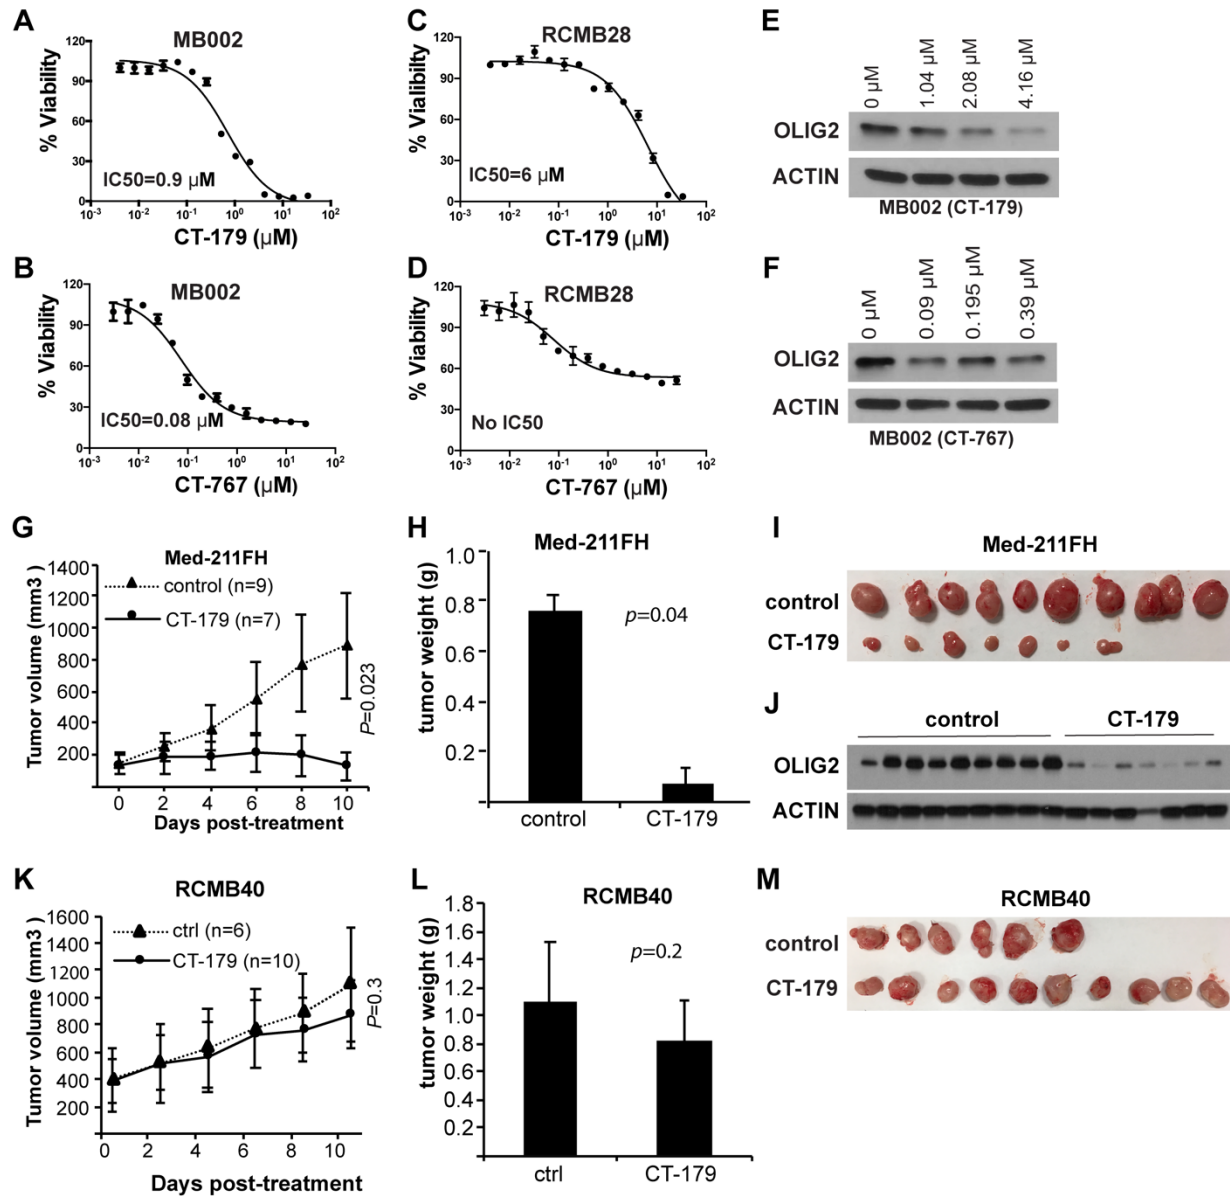

Figure S6

**Figure S6. OLIG2 antagonists inhibit the growth of OLIG2<sup>high</sup> but not OLIG2<sup>low</sup> MYC-amplified MB tumors *in vitro* and *in vivo***

(A-D) OLIG2<sup>high</sup> (MB002) or OLIG2<sup>low</sup> (RCMB28) tumor cells were treated with CT-179 (A, C) or CT-767 (B, D) at indicated concentrations for 72 hours, and cell viability was determined by Cell-Titer-Glo. (E, F) Western blot analysis of OLIG2 expression in MB002 cells treated with CT-179 or CT-767 for 48 hours.

(G-J) CT-179 inhibits the growth and reduces OLIG2 expression of OLIG2<sup>high</sup> MB (Med-211FH) in the flank mouse model. P values determined by Student T test.

(K-M) OLIG2<sup>low</sup> MB (RCMB40) does not respond to OLIG2 antagonist in the flank mouse model. P values determined by Student T test.



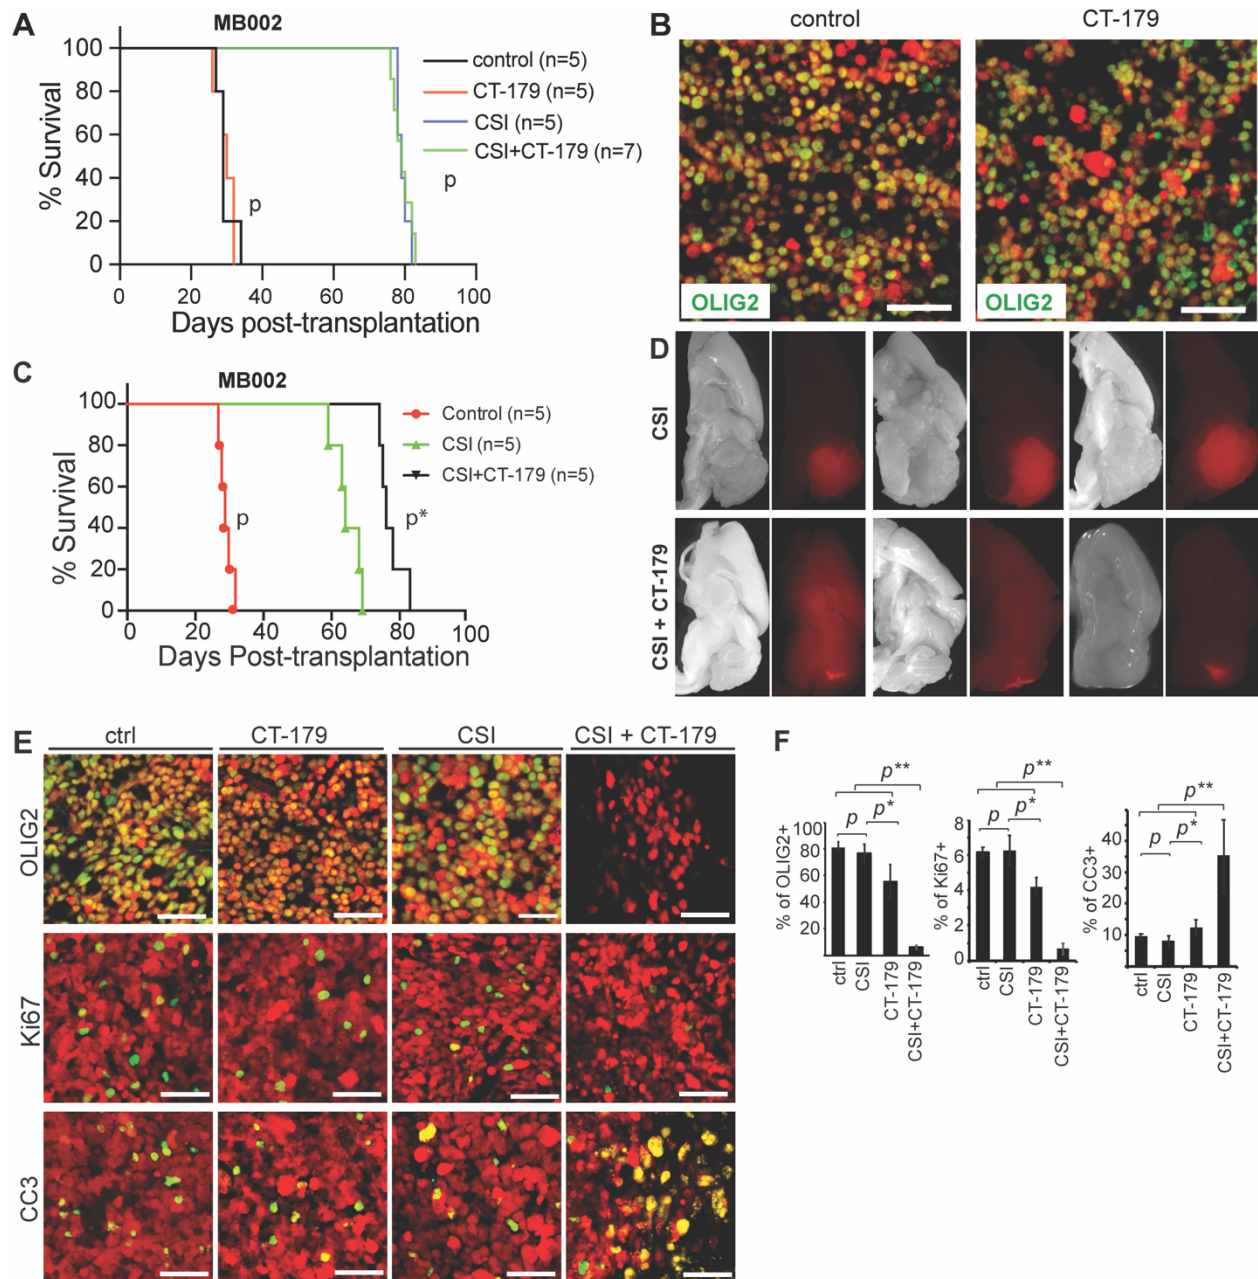

Figure S7



**Figure S7. CT-179 delivered via IT injection after irradiation suppresses the growth of OLIG2 expressing MYC-amplified MB cells *in vivo***

(A-B) Mice with intracranial MB002 tumors were treated with vehicle, CT-179, CSI, or CSI + CT-179. CT-179 was delivered by oral gavage. (A) Mice survival curves. Analysis by Kaplan Meier, Logrank test  $p > 0.05$ , control vs CT-179, CSI vs CSI + CT-179. CT-179 delivered by oral gavage did not inhibit the growth of intracranial OLIG2<sup>high</sup> (MB002) tumors. (B) OLIG2 protein level was not reduced in the tumors when CT-179 was delivered by oral gavage, as assessed by IHC staining. Olig2 (green), tumor cells (red, mCherry). Scale bars = 50  $\mu$ m.

(C-D) Intrathecal injection of CT-179 once a week for 3 weeks after irradiation prolongs animal survival compared to control or CSI alone. (C) Mice survival curves analyzed by Kaplan Meier, Logrank test  $p = 0.0001$ , CSI vs control.  $p^* = 0.0018$ , CSI vs CSI + CT-179. (D) Images of brains from animals treated with CSI (top panels) or CSI + CT-179 (bottom panels). The tumor sizes were much smaller in CSI + CT-179 group compared to CSI alone. Whole mount images in bright field. Tumor cells indicated in red (mCherry).

(E) IHC staining with antibodies (green) against OLIG2, Ki67, or CC3 in the tumors from animals treated with CSI alone or CSI plus increased dose of CT-179 twice weekly. Red is mCherry, indicating tumor cells. Scale bars = 50  $\mu$ m.

(F) Quantification of percentage of Olig2<sup>+</sup>, ki67<sup>+</sup> or CC3<sup>+</sup> tumor cells in MB002 tumor bearing animals treated with vehicle, CT-179, CSI, or CSI plus increased dose CT-179 ( $n = 5$  for each group). Student T test  $p > 0.05$ ,  $p^* < 0.05$ - $0.01$ ,  $p^{**} < 0.01$ .

**Table S1. Comparison of gene expression profiles of Spontaneously relapsed tumors to the neurosphere-derived transplantation tumors and the untreated primary tumors in the Excel file.**

**Experimental Procedures**

**RNA-Seq Data Analysis**

The single-end reads from the MB002 PDX line primary tumor, spontaneous recurrent tumor and neurosphere-derived tumors were aligned to human genome hg38 using STAR v2.4.1 tool(1). Gene expression counts were computed using featureCounts function of the Subread package v1.4.6 with the RefSeq h38 annotation based. Alignment and counts data quality control was performed using Qualimap(2). Differentially expressed genes between primary tumors, spontaneous recurrent tumor and neurosphere-derived tumors were detected using DESeq2(3) with minimum adjusted p-value limit of 0.0001 and a log2 fold change  $> 1$  or  $< -1$ . Heatmaps and clustering were performed with the R packages “gplots” and “WGCNA” respectively. Gene Enrichment Analysis was performed using the GSEA(4) v4.1.0 software (<http://software.broadinstitute.org/gsea/index.jsp>) and the following Molecular Signatures Database (MSigDB): hallmark gene sets (H), the curated gene sets (C2) and the ontology gene sets (C5). Venn diagrams were generated using the differentially expressed genes

from DESeq2 for the following comparisons: Spontaneous versus Primary tumors, Neurosphere-derived tumors versus Primary tumors and Neurosphere-derived tumors versus Spontaneous tumors.

### **Survival Analysis of Patients**

Overall survival functions were estimated using the Kaplan-Meier method and p-values were calculated using the log-rank test. The statistical analysis was performed in the R statistical environment using the R packages survival (v2.41–3) and survminer (v0.4.0). Gene expression and overall survival data from 31 Group 3<sub>gamma</sub> medulloblastoma tumors were downloaded from a previously published dataset (5).

### **Lentivirus Plasmids**

Lentivirus plasmids used include pWPI-mCherry-Luciferase (a gift from Jun Wang at Sanford Burnham Prebys Medical Discovery Institute) and pWPI-*OLIG2*-IRES-GFP. To create pWPI-*OLIG2*-IRES-GFP, *OLIG2* was PCR-amplified from pMXs-*OLIG2* that was a gift from Kevin Eggan (Addgene plasmid # 32933)(6). The primers used for *Olig2* fragment amplification are: Forward primer, CGACATTTAAATTTAATGGACTCGGACGCCAGC; reverse primer, ATACCGTCGAGATTATCACTTGGCGTCGGAGGTG. The vector of pWPI-IRES-GFP (a gift from Didier Trono, Addgene plasmid # 12254) was linearized by restriction enzyme *PacI*, and *Olig2* fragment was subcloned into the vector using In-Fusion® HD Cloning Kit (Clontech) following the user manual.

### **Cell Culture and Neurosphere Assay**

To culture PDX MB cells, we used neural stem cell culture composed of a 1:1 mixture of Neurobasal Media-Vitamin A (Gibco) and Ham's F-12-based medium (Gibco), supplemented with Non-Essential Amino Acids (Gibco, 1:100), B27 (Gibco, 1:50), 2 mM glutamine, 5 mM HEPES (Gibco), 20 ng/mL of bFGF (Peprotech), 20 ng/mL of EGF (Peprotech), and 20 ng/mL of heparin (Sigma Aldrich). To determine whether the radioresistant tumor cells can persist and self-renew in longer-term culture,

FAC-sorted mCherry<sup>+</sup> radioresistant tumor cells from cerebellum and bulk tumor cells were cultured for 7 days at a density of 2,000 cells/mL in stem cell medium to promote neurosphere formation. Then every 7 days the neurospheres were dissociated into single-cell suspensions and replated to form new neurospheres. Total cell number was counted with a hemocytometer. Cells were passaged 6 times before experiments were terminated.

### **Immunohistochemistry Staining and Antibodies**

Antibodies used for immunostaining include Ki67 (Abcam, ab16667, 1:100), Nestin (Millipore, MAB353, 1:100), OLIG2 (Millipore, AB9610 and MABN50, 1:800), Synaptophysin (Abcam, ab8049, 1:500), Tuj1 (Abcam, AB18207, 1:100), GFAP (Agilent, Z0334, 1:1000), and Cleaved caspase-3 (Cell Signaling Technologies, 9661S, 1:1000). Secondary antibodies included anti-mouse and anti-rabbit antibodies conjugated to Alexa Fluor 488, 594 or 647 (all from Invitrogen, and used at 1:200).

For immunohistochemical staining of frozen sections, animals were perfused with PBS followed by 4% paraformaldehyde (PFA). Whole brain and spinal cord were removed, fixed with 4% PFA overnight, cryoprotected in 30% sucrose for 24 hrs, then embedded in Tissue Tek-OCT (Sakura Finetek). Frozen blocks were cut at 12  $\mu$ m into sagittal series of sections. Sections were permeabilized with 0.1% Triton X-100 in PBS for 30 minutes and blocked for one hour with 10% normal donkey serum in PBS containing 0.1% Triton X-100, followed by overnight incubation with primary antibodies at 4°C. Sections were then stained with secondary antibody for 2 hrs at room temperature, counterstained with DAPI (Invitrogen), and mounted with Fluoromount-G (Southern Biotech). Stained slides were visualized under the microscope.

### **Western-blotting and Antibodies**

To evaluate gene expression at the protein level, tumor cell pellets were lysed with Pierce RIPA buffer (Thermo Fisher Scientific) supplemented with proteinase and phosphatase inhibitor cocktail (Thermo Fisher Scientific). Protein lysates were separated on an 8-16% Mini-Protean TGX gel (Bio-Rad) by

electrophoresis, then transferred to a Immobilon-P membrane (EMD Millipore). Membranes were blocked in 5% nonfat dry milk (Bio-Rad) for one hour at room temperature, and incubated with primary antibodies to OLIG2 (1:1000, Millipore, MABN50), MYC (1:1000, abcam, ab32072) or beta-actin (1:3000, Abcam, ab8226) at 4°C overnight. Membranes were then stained with HRP-conjugated secondary antibodies (1:5,000, GE Life Sciences) for one hour at room temperature. Bands were visualized using Amersham ECL (GE Healthcare).

### **Fluorescence In Situ Hybridization**

FISH analyses were performed on 2 µm thin sections from formalin-fixed, paraffin-embedded tumor tissue. A ZytoLight® SPEC MYC/CEN 8 Dual Color Probe (Zytovision, Bremerhaven, Germany) was used to detect *MYC* amplifications according to the manufacturer's recommendations. We use the following definition for *MYC* amplification: >5% of nuclei within the sample (of 200 counted) have a strong speckled staining pattern (indicative of the formation of double-minutes or homogenously-stained regions), and the test probe show a copy number  $\geq 4$  times of the reference copy number signal.

### **Cell Survival Assay *in Vitro***

To assess the effect of OLIG2 inhibitor on cell growth *in vitro*, tumor cells were freshly isolated from tumor-bearing mice and were plated into 384-well Greiner plates. After treatment with the indicated concentrations of CT-179 and CT-767 for 72 hrs in stem cell medium, cell viability was then assessed using the CellTiter-Glo Luminescent Cell Viability assay (Promega) on a Fluostar spectrophotometer (BMG Laboratories).

### ***In Vivo* Bioluminescent Imaging**

Tumor-bearing animals were subjected weekly to bioluminescence imaging using IVIS spectrum. Briefly, mice were given intraperitoneal injections of 150 µg/g Xenolight D-Luciferin potassium salt (Perkin Elmer) and anesthetized with 2.5% isoflurane. 10 minutes post-injection, the animals were

imaged using the IVIS® Lumina III (IVIS-200) imaging system.

### Supplemental References

1. Dobin A, Davis CA, Schlesinger F, Drenkow J, Zaleski C, Jha S, *et al.* STAR: ultrafast universal RNA-seq aligner. *Bioinformatics* 2013;**29**(1):15-21 doi 10.1093/bioinformatics/bts635.
2. Okonechnikov K, Conesa A, Garcia-Alcalde F. Qualimap 2: advanced multi-sample quality control for high-throughput sequencing data. *Bioinformatics* 2016;**32**(2):292-4 doi 10.1093/bioinformatics/btv566.
3. Love MI, Huber W, Anders S. Moderated estimation of fold change and dispersion for RNA-seq data with DESeq2. *Genome Biol* 2014;**15**(12):550 doi 10.1186/s13059-014-0550-8.
4. Subramanian A, Tamayo P, Mootha VK, Mukherjee S, Ebert BL, Gillette MA, *et al.* Gene set enrichment analysis: a knowledge-based approach for interpreting genome-wide expression profiles. *Proceedings of the National Academy of Sciences of the United States of America* 2005;**102**(43):15545-50 doi 10.1073/pnas.0506580102.
5. Cavalli FMG, Remke M, Rampasek L, Peacock J, Shih DJH, Luu B, *et al.* Intertumoral Heterogeneity within Medulloblastoma Subgroups. *Cancer Cell* 2017;**31**(6):737-54 e6 doi 10.1016/j.ccell.2017.05.005.
6. Son EY, Ichida JK, Wainger BJ, Toma JS, Rafuse VF, Woolf CJ, *et al.* Conversion of mouse and human fibroblasts into functional spinal motor neurons. *Cell Stem Cell* 2011;**9**(3):205-18 doi 10.1016/j.stem.2011.07.014.
